# Supplementary material for: Dioxouranium(VI) oxalate complexes †
Source: Royal Society of Chemistry journal article supplement (doi:10.1039/b006544g), 2000-01-01
Supplement: b006544g.doc [file b006544g.doc]

# **ESI**

**Title**: DIOXOURANIUM(VI) OXALATE COMPLEXES

**Authors**: Diego FERRI, Mauro IULIANO, Carla MANFREDI, Ermanno VASCA, Tonino CARUSO, Mariateresa CLEMENTEand Cecilia FONTANELLA

**Fig. 1** Gran’s plot of the potentiometric data. As it may be observed the functions *X*(*V*) (eq. (8))

*X* = (*V*0+*V*)*10 (-*E*/29.58) = *A*1*10 (-*E°*/29.58)**V* (8)

are straight lines passing through the origin of the axes ( *i*.*e*. the concentration of C2O42- is in TS2 equals zero). Furthermore the *E*0 values listed in the figure are constant, within each titration, as expected if the electrode has a nernstian behaviour.

# **ESI**

**Title**: DIOXOURANIUM(VI) OXALATE COMPLEXES

**Authors**: Diego FERRI, Mauro IULIANO, Carla MANFREDI, Ermanno VASCA, Tonino CARUSO, Mariateresa CLEMENTEand Cecilia FONTANELLA

**Table 1** Survey of the experimental data log(*A*/*a*)*Q* plotted *vs.* log *a* in **Fig 2**.

*Q*=0.53

log (*A*/*a*), log *a;* 0.165, 3.519; 0.185, 3.290; 0.224, 3.120; 0.260, 2.990; 0.274, 2.885;

0.290, 2.812; 0.294, 2.739.

*Q*=0.76

log (*A*/*a*), log *a;* 0.396, 3.334; 0.417,3.236; 0.448, 3.104; 0.505, 2.934; 0.523, 2.868;

0.539, 2.801; 0.551, 2.751; 0.561, 2.701; 0.578, 2.608; 0.583, 2.565.

*Q*=1.05

log (*A*/*a*), log *a;* 0.468, 3.604; 0.550, 3.505; 0.656, 3.393; 0.722, 3.324; 0.773, 2.780;

0.810, 2.228; 0.842, 2.188; 0.885, 2.153.

*Q*=1.52

log (*A*/*a*), log *a;*0.861,3.685; 1.018, 3.659; 1.140, 3.638; 1.238, 3.625; 1.327, 3.614;

1.403, 3.606; 1.472, 3.594; 1.533, 3.579; 1.567, 3.573.

*Q*=1.92

log (*A*/*a*), log *a;* 0.534, 4.028; 0.704, 3.925; 0.829, 3.889; 0.925, 3.872; 1.001, 3.858;

1.087, 3.844; 1.156, 3.836; 1.229, 3.827; 1.289, 3.821; 1.349, 3.818; 1.396, 3.813;

1.444, 3.810; 1.483, 3.807; 1.526, 3.803; 1.562, 3.801; 1.598, 3.798; 1.663, 3.796;

1.661, 3.794.

# **ESI**

**Title**: DIOXOURANIUM(VI) OXALATE COMPLEXES

**Authors**: Diego FERRI, Mauro IULIANO, Carla MANFREDI, Ermanno VASCA, Tonino CARUSO, Mariateresa CLEMENTEand Cecilia FONTANELLA

**Table 2** Survey of the experimental data log (*H*/*h*)*Q* plotted *vs.* log *h* in **Fig. 3**.

*Q*=0.53

log (*H*/*h*), log *h;*0.569, 4.082; 0.677, 3.971; 0.866, 3.909; 0.970, 3.871; 1.041, 3.850.

## *Q*=0.76

log (*H*/*h*), log *h*; 0.609, 3.620; 0.793, 3.528; 0.886, 3.488; 0.954, 3.463; 1.020, 3441;

1.072, 3.425: 1.121, 3.412; 1.167, 3.400; 1,204, 3.390; 1.255, 3.380.

*Q*=1.05

log (*H*/*h*), log *h*; 0.433, 3.598; 0.514, 3.477; 0.597, 3.339; 0.650, 3.255; 0.689, 3.196;

0.725, 3.144; 0.757, 3.097; 0.784, 3.054.

#### *Q*=1.52

log (*H*/*h*), log *h*; 0.380, 3.031; 0.386, 2.846; 0.397, 2.714; 0.406, 2.611; 0.415, 2.521;

0.424, 2.445; 0.434, 2.374; 0.442, 2.317; 0.449, 2,273.

#### *Q*=1.92

log (*H*/*h*), log *h*; 0.213, 3.459; 0.259, 3.213; 0.276, 3.062; 0.282, 2.952; 0.289, 2.870;

0.298, 2.776; 0.303, 2.702; 0.309, 2.627; 0.314, 2.566; 0.317, 2.504; 0.322, 2.457;

0.326; 2.409; 0.330, 2.370; 0.334, 2.328; 0.337, 2.293; 0.341, 2.258; 0.345, 2.225;

0.349, 2.198.

# **ESI**

**Title**: DIOXOURANIUM(VI) OXALATE COMPLEXES

**Authors**: Diego FERRI, Mauro IULIANO, Carla MANFREDI, Ermanno VASCA, Tonino

CARUSO, Mariateresa CLEMENTEand Cecilia FONTANELLA

**Table 3** Survey of the -*Y* (-log *h*) data, related by eqn. (18) and divided in two series: I, obtained in 3M NaClO4 (plotted in **Fig. 4**) and II, collected in 2M NaClO4. The data pertaining to different titrations are enclosed between brackets and are separated by a star.

#### Series I

[142.96, 0.018; 143.84, 0.075; 144.62, 0.149; 145.30, 0.222; 156.28,1.318; 219.44, 3.337; 145.98, 0.322; 146.55, 0.411; 147.36, 0.533; 148.10, 0.663; 149.99, 0.865. ] * [ 171.58, 2.014; 265.81, 4.522; 276.55, 4.685; 283.17, 4.790; 288.20, 4.872; 291.53, 4.929; 291.53, 4.976.] * [ 142.62, 0.011; 143.53, 0.056; 144.37, 0.114; 145.03, 0.167; 147.50, 0.466; 148.36, 0.585; 149.48, 0.735; 151.59, 0.991; 154.65, 1.300. ] * [ 184.83, 2.386; 189.10, 2.563; 192.68, 2.675; 196.51, 2.796; 201.58, 2.946; 208.16, 3.126; 215.21, 3.307; 221.80, 3.470; 228.74, 3.631; 234.16, 3.753. ] * [ 146.01, 0.321; 146.90, 0.422; 147.49, 0.540; 148.53, 0.683; 150.21, 0.856; 152.50, 1.064; 152.24, 1.096. ] * [ 150.85, 1.122; 151.55, 1.179; 153.91, 1.252; 155.65, 1.338; 157.40, 1.438; 159.80, 1.547; 163.00, 1.676; 166.40, 1.805; 171.20, 1.950; 179.60, 2.215; 190.90, 2.548. ] * [ 132.03, 0.396; 134.03, 0.333; 135.67, 0.271; 137.46, 0.219; 139.44, 0.142; 140.77, 0.072; 141.82, 0.014; 142.64, 0.038; 143.14, 0.084; 143.53, 0.136. ] * [ 182.87, 2.389; 183.88, 2.416; 184.94, 2.446; 186.10, 2.480; 187.37, 2.521; 188.44, 2.555; 189.93, 2.600; 191.78, 2.662; 194.27, 2.743; 197.91, 2.866; 201.70, 2.987. ] * [ 142.89, 0.054; 143.45, 0.009; 143.90,0.040; 144.38, 0.095. ] * [ 212.27, 3.377; 221.89, 3.596; 231.79, 3.814; 241.16, 4.003; 257.36, 4.311; 268.76, 4.515; 291.02, 4.910. ] * [ 175.18, 2.065; 176.89, 2.108; 178.72, 2.155; 180.43, 2.212; 182.22, 2.281; 184.12, 3.371. ] * [ 171.58, 2.014; 265.81, 4.522; 276.55, 4.685; 283.17, 4.790; 288.20, 4.872; 291.53, 4.929; 294.44, 4.976. ] * [259.08, 4.378; 267.74, 4.528; 274.36, 4.640; 279.46, 4.732; 284.29, 4.809; 288.22, 4.871; 291.84, 4.939; 294.64, 4.973; 296.38; 297.39, 5.035; 298.36, 5.058. ] * [238.56, 3.902; 252.03, 4.183; 260.41, 4.343; 265.70, 4.446; 271.65, 4.557; 277.38, 4.660. ] * [ 243.19, 3.995; 242.03, 3.973 ; 241.08, 3.955; 240.15, 3.924; 239.55, 3.918; 239.29, 3.912; 238.87, 3.903. ] * [205.77, 3.048; 207.05, 3.092; 208.26, 3.137; 210.58, 3.198; 213.89, 3.282; 218.91, 3.424. ] * [ 175.18, 2.065; 176.89, 2.108; 178.72, 2.155; 180.43, 2.212; 182.22, 2.281; 184.12, 2.371. ] * [142.96, 0.018; 143.84, 0.075; 144.62, 0.149; 145.30, 0.222; 145.98, 0.322; 146.55, 0.411; 147.36, 0.533; 148.10, 0.663; 149.99, 0.865; 152.24, 1.096. ] * [129.56, 0.476; 132.03, 0.396; 134.03, 0.333; 135.67, 0.271; 137.46, 0.219; 139.34, 0.142; 140.77, 0.072;141.82 , 0.014; 142.64, 0.038; 143.14, 0.084. 143.54, 0.136. ] * [ 179.25, 2.206; 180.50, 2.224; 181.12, 2.581; 182.14, 2.293; 183.19, 2.328; 184.47, 2.381; 185.68, 2.409; 187.08, 2.456; 188.50, 2.604; 190.39, 2.566; 192.23, 2.637; 194.46, 2.702; 196.78, 2.776; 199.72, 2.881; 202.06, 2.962; 205.98, 3.073; 211.14, 3.224. ]

# **ESI**

**Title**: DIOXOURANIUM(VI) OXALATE COMPLEXES

**Authors**: Diego FERRI, Mauro IULIANO, Carla MANFREDI, Ermanno VASCA, Tonino CARUSO, Mariateresa CLEMENTEand Cecilia FONTANELLA

#### **Table 3** (cont.)

#### Series II

[261.74, 4.396; 245.21,4.087; 230.54, 3.790; 216.09, 3.467; 200.34, 3.065; 182.57, 2.552; 171.26, 2.196; 164.84, 1.981; 160.28, 1.831; 157.48, 1.729; 155.37, 1.651;]*­­ [139.44, 0.611; 138.99, 0.581; 137.50, 0.529; 137.70, 0.444; 137.02, 0.378; 136.43, 0.301; 135.99, 0.242; 135.43, 0.180; 134.97, 0.132;] * [293.59, 4.902; 266.39, 4.418; 247.97, 4.076; 236.28, 3.846; 225.12, 3.607; 208.95, 3.333;] * [213.74, 3.377; 183.60, 2.548; 173.40, 2.215; 165.82, 1.950; 161.05, 1.805; 157.88, 1.676; 154.68, 1.547; 152.09, 1.438; 150.08, 1.338; 147.69, 1.252; 146.19, 1.179; 145.25, 1.112; 291.14, 4.910; 268.83, 4.515; 4.311, 257.48; 241.34, 4.003; 232.14, 3.814; 222.39, 3.596; 231.04, 3.377;] * [ 140.75, 0.611; 140.23, 0.581; 138.65, 0.529; 138.80, 0.444; 138.11, 0.378; 137.51, 0.301; 137.10, 0.242; 136.57, 0.180; 136.13, 0.132; 134.59, 0.085; 135.22, 0.034;] *[131.11, 0.277; 131.45, 0.260; 131.86, 0.236; 132.37, 0.206; 132.82, 0.178; 133.27, 0.145; 133.72, 0.109; 134.17, 0.069; 134.61, 0.028; 135.05, 0.014;] *

# **ESI**

**Title**: DIOXOURANIUM(VI) OXALATE COMPLEXES

**Authors**: Diego FERRI, Mauro IULIANO, Carla MANFREDI, Ermanno VASCA, Tonino CARUSO, Mariateresa CLEMENTEand Cecilia FONTANELLA

**Table 4** Survey of the *Z* (log *a*) data, defined by eqn. (21), divided in two series: I, collected in 3M NaClO4 (plotted in **Fig. 5**), and II, obtained in 2M NaClO4.

#### Series I

#### variable *B*

*Z*, log *a*; 0.508, 6.461; 0.563, 6.382; 0.632, 6.285; 0.719, 6.148; 0.833, 5.986; 0.985, 5.779; 1.081, 5.618; 1.191, 5.495; 1.319, 5.329; 1.468, 5.159; 1.624, 4.964; 1.772, 4.755; 1.934, 4.561; 2.104, 4.375.

#### variable *B*

*Z*, log *a*; 0.185, 7.018; 0.201, 7.000; 0.220, 6957; 0.244, 6.898; 0.272, 6.839; 0.297, 6.790; 0.326, 6.730; 0.362, 6.671; 0.408, 6.600; 0.466, 6.512; 0.543, 6.388; 0.651, 6.248; 0.813, 6.028; 1.077, 5.671.

#### variable *B*

*Z*, log *a*; 1.185, 5.600; 1.412, 5.306; 1.657, 4.992; 1.842, 4.667; 2.020, 4.413; 2.130, 4.191; 2.217, 4.107; 2.296, 3.956.

#### *B* = 5.06 mM, p*H* = 1

*Z*, log *a*; 0.239, 6.890; 0.296, 6.775; 0.366, 6.654; 0.428, 6.553; 0.484, 6.466; 0.547, 6..377; 0.601, 6.299; 0.617, 6.232; 0.746, 6.092; 0.796, 6.019; 0.838, 5.959; 0.873, 5.907; 0.907, 5.853; 0.935, 5.809; 0.983, 5.728; 1.008, 5.690.

*B* =5.00 mM, p*H* = 2

*Z*, log *a*; 0.431, 6.527; 0.514, 6.409; 0.592, 6.308; 0.682, 6.191; 0.765, 6.085; 0.917, 5.889; 1.004, 5.792; 1.075, 5.694; 1.140, 5.601; 1.199, 5.521; 1.254, 5.449; 1.303, 5.365; 1.363, 5.267; 1.417, 5.179; 1.466, 5.105.

*B* = 20.03 mM, p*H* = 1

*Z*, log *a*; 0.478, 6.478; 0.501, 6.451; 0.524, 6.416; 0.548, 6.387; 0.572, 6.352.

#### Series II

*Z*, log *a*; 1.730, 4.580; 1.466, 4.941; 1.165, 5.343; 0.907, 5.683; 0.738, 5.899; 0.583, 6.097; 0.476, 6.243; 0.398, 6.364;
